# Supplementary material for: Sheep rumen and omasum primary cultures and source epithelia: barrier function aligns with expression of tight junction proteins
Source: Oxford University Press journal article supplement (doi:10.1242/jeb.055582), 2011-08-10
Supplement: jeb055582tables1-s2.pdf [file jeb055582tables1-s2.pdf]

Table S1. Primers used for the identification of omasal claudins

| Primer no. | Primer name                                                          | Sequence                                                                               |
|------------|----------------------------------------------------------------------|----------------------------------------------------------------------------------------|
| I          | bov CLDN1 for<br>bov CLDN1 rev                                       | ATGGCCAACGCGGGTTGCA<br>TCACACATAGTCTTTCCCACTGGAAG                                      |
| II         | bov CLDN2 for<br>bov CLDN2 rev                                       | ATGGCCTCTCTTGGCCTCCAGCTT<br>TCACACATACCCCGTCAGGCTGTAG                                  |
| III        | bov CLDN3 for<br>bov CLDN3 rev                                       | ATGTCCATGGGCCTGGAGATCGC<br>TCAGACGTAGTCCTTGCGGTCGTAG                                   |
| IV         | bov CLDN4 for<br>bov CLDN4 rev                                       | ATGGCTTCCATGGGGCTGCAGGT<br>TTAGACGTAGTTGCTGGCTGGGGC                                    |
| V          | bov CLDN5 for<br>bov CLDN5 rev                                       | ATGGGGTCGGCGCGCTGGAGATTC<br>CAGACGTAGTTCTTCTTGCATAGTCCGGT                              |
| VI         | bov CLDN7 for<br>bov CLDN7 rev                                       | ATGGCCAATTCGGGCCTGCAGCTGC<br>TCACACATACTCTTTGGCAGAGTTGG                                |
| VII        | bov CLDN8 for<br>bov CLDN8 rev                                       | ATGGCTACCTACGCCCTGCAAA<br>CTACACGTAAGTACTTTTGGAGTAC                                    |
| VIII       | bov CLDN10-1 for<br>bov CLDN10-2 for<br>bov CLDN10 rev               | ATGGCGAGCACGGCGTCGG<br>ATGTCCAGGGCTCAGATCTCGG<br>TTAGACGTATGCGTTTTTGTCAAAGTTTTTGAAG    |
| IX         | bov CLDN11 for<br>bov CLDN11 rev                                     | ATGGTGGCCACATGCTTGCAG<br>TTATACATGGGCACTCTTGGCATGA                                     |
| X          | bov CLDN12 for<br>bov CLDN12 rev                                     | ATGGGCTGTGGGATGTCCAC<br>TTAGGTGGTGGGAACTACTGG                                          |
| A          | bov Cldn1m for<br>bov Cldn1m rev                                     | AGCGCGGGCGCCCGAGCGAGTCATG<br>CTTGTTGGTTCCAACAGGATTGTCAGCTTTCGCTTCTGTG                  |
| B          | bov Cldn2m for<br>bov Cldn2m rev                                     | CTAAGCCGCGTGTGCTGAGAGGTCTACCATG<br>CACCCCACTCTGGCCCTGGTTCT                             |
| C          | bov Cldn3m for<br>bov Cldn3m rev                                     | AGCCGGCTTTGGCGCGGCAGCCATG<br>GGAGTGGTCGGGGCTTCCCGCGGTC                                 |
| D          | bov Cldn4m for<br>bov Cldn4m rev                                     | TCGCCTCTTCGCCGACGCTGAGCCATG<br>CAGTGAGCTCAGTCCAGGGAGAAACAAGATGAAAGG                    |
| E          | bov Cldn7m for<br>bov Cldn7m rev                                     | GCGCCCCCGTCTATTCTGAAGGCGGAA<br>GGTTGGGGCAGGGGCGTCCCACTCA                               |
| F          | bov Cldn1 middle for<br>bov Cldn4 middle for<br>bov Cldn7 middle for | GGGACTAATAGCCATCTTTGTGGCC<br>GGCGGCCCGTCCCTCATCGTCATCTGTA<br>ACGACTCGGTGCTCTCCCTGCCGGC |

Primers I–X were used for initial screening, primers A–E were used for the cloning and sequencing of sheep omasal claudins, and primer F was used for verification of sequencing. All primers are based on bovine sequences published in the NCBI nucleotide database; however, primers A–E are not within the open reading frame to obtain the genuine sheep sequence.

Table S2. Sequences for sheep claudin-1, -4 and -7 mRNA [complete coding sequences (CDSs)] and protein

HM117762.1 **Claudin-1**

>Seq1 [organism=Ovis aries] **Ovis aries claudin 1 (CLDN1) mRNA, complete CDS**

ATGGCCAACGCGGGGTTGCAGCTGCTGGGCTTCCCTGGCGTTTCTGGGCTGGATCGGCTCCATCGTCAGCAGCGGCGCTGCCCCAGTGGAAAGTTTT  
 ACTCCTATGCTAGTGACAACATCGTGACGGCCAGGCCATCTACGAGGGGCTGTGGATGTCGTGCGTGTGCGAGAGCACCGGGCAGATCCAGTGCAA  
 AGTCTTCGACTCCTTGTGAATCTGAACAGCACTCTGCAAGCAACCCGTGCCTTGATGGTGATCGGCATCCTGCTGGGACTAATAGCCATCTTTGTGGC  
 CACCCTTGGCATGAAGTGTATGAAGTGCATGGAAGACGACGAGGCACAGAAGATGCGGATGGCTGTCTTTGGGGGCGTGATCTTTCTTATTTTCAGGCT  
 GGCTGTTTTGGTTGCCACAGCATGGTATGGCAATAGAATTGTTCAGAAATCTATGACCCCATGACCCCGGTcAATGCCAGGTATGAATTTGGTCAGGCT  
 CTCTTCATGGCTGGGcTgcTGTCTCTCTGCCTTCTGggAGGCGCCCTGCTGTGCTGCTCTGTcCcCGGAAAACAACATCTTACCCAACACCCAGGCC  
 CTATCCAAGCCAGCACCTTCCAGTGGGAAAGACtATGTGTGA

>Seq1 **Ovis aries claudin 1**

MANAGLQLLGFILAFGLGWIGSIVSTALPQWKVYSYASDNIVTAQAIYEGLWMSCVSQSTGQIQCKVFDSELLNLSLQATRALMVGILLGLIAIFVATLGMKCMK  
 CMEDDEAQKMRMAVFGGVIPLISGLAVLVATAWYGNRIVQEFYDPMTPVNARYEFGQALFIGWAAAASLCLLGGALLCCSCPRKTTSYTPRPPYPKPAPSSGKD  
 YV

HM117763.1 **Claudin-4**

>Seq2 [organism=Ovis aries] **Ovis aries claudin 4 (CLDN4) mRNA, complete CDS**

ATGGCTTCCATGGGGCTGCAGGTGATGGGCATCGCGCTGGCCGTGCTGGGCTGGGCTGGGCGCCATCCTGAGCTGCGCGCTGCCATGTGGCGGGTG  
 ACGGCCTTCCATCGGCAGCAACATCGTCACGTCCGACACCATCTGGGAGGGCCTGTGGATGAACGCTGCGTGGTGCAGAGCACCGGCCAGATGCAGTGCA  
 AGGTGTACGACTCGCTGCTGGCGCTGCCGACAGGACCTGCAGGCGGCCCGCGCCCTCATCGTCATCTGTATCATCCTGGCCGTGTTTTGGCGTGTGTT  
 GTCGGTGGTGGGCGCAAGTGCACCAACTGCGTGGATGATGAGAGCCCAAGGCCAAGATATGATCGTGGCCGGCGTGGTGTCTCTGCTGGCCGG  
 CCTGCTGGTGTGGTGGCCGTGCTCTGGACGGCTAACAACGTATCCGTGACTTCTACAACCCCTGGTAgCCTCGGGCCAGAAGCGGGAGATGGGG  
 GCCTCGCTCTACGTGGGCTGGGCGCCGCTGGCTTGTGATGCTTGGGGGAACCTGCTCTGCTTCAACTGCCCGCCACGCAACAACAAGCCCTACT  
 CGCTAAGTACTCCGCCGCCGCTCCGCCAGCCAGCAACTATGTCTAA

>Seq2 **Ovis aries claudin 4**

MASMLQVMGIALAVLGLWLGAILSCALPMWRVTAFIGSNIVTSQTIWEGLWMNCVVQSTGQMCKVYDSSLALPQDLQAARALIVICILAVFGVLLSVVGGKCT  
 NCVDDSPKAKIMIVAGVVFLLAGLLVMPVSWTANNVIRDFYNPLVASGQKREMGASLYVWAAAGLLMLGGTLLCFNCPPRNNKPYSAKYSARSAPASN  
 YV

HM142819.1 **Claudin-7**

>Seq3 [organism=Ovis aries] **Ovis aries claudin 7 (CLDN7) mRNA, complete CDS**

ATGGCCAATTCGGGCCTGCAGCTGCTGGGCTTTCCATGGCTCTGTGGGCTGGGTGGGCGCTGGGCATGCACCGCCATCCCGCAGTGGCAGATGA  
 GCTCGTACGCTGGCGACAATATCATCACCGCCAGGCCATGTACAAGGGGCTGTGGATGGACTGCGTCACGCAGAGCACCGGCCATGATGAGCTGCAA  
 AATGTACGACTCGGTGCTCTCCCTGCCGCGGCCTTGCAGGCCACTCGAGCCCTAATGGTGGTTTCCCTGGTGTGGGCTTCTGGCCaCATTGCTGG  
 CCaGATGGGCATGAAGTGTACAACTGTGGGGGAGACGACAAAGTGAAGAAGGCCCGGATAGCCATGACGGGAGGCATCATTTTTCATCTTGGCAGGT  
 CTTGCTGCCTTGATAGCTTGTCTGCTGGTACGGCCATCAGATTGTCTCAGATTCTATAACCCGTTGGTCCCCATGAATGTTAAGTATGAATTTGGTCCTG  
 CCATCTTCATTGGCTGgGCAgGGTCTGCTGATCATCCTGGGAGGTGCGCTGCTCTTGTCTCTGCTGGGAGTGAAGGAAAGCTGGATACCGTG  
 CAACCTCGCTCTACCTAAGCCCAACTCTGCCAAGGAGTATGTGTGA

>Seq3 **Ovis aries claudin 7**

MANSGLQLLGFSMALVGVVGLVACTAIPQWQMSSYAGDNITQAMYKGLWMDCVTQSTGMMSCMKYDVSLSLPAALQATRALMVSLSVLGFLATFVATMG  
 MKCTNCGDVKVKKARIAMTGGIIFILAGLAALACSWEYGHQIVSDFYNPLVPMNVKYEFGPAIFGWAGSALLLGGALLSCSPGSESKAGYRAPRSYPKPN  
 KEV

Differences compared with cattle (*Bos taurus*) are marked in yellow.
